# Supplementary material
Source: PubMed Central journal article supplement (PMC5116411)
Supplement: NIHMS821065-supplement-Supplement.pdf [file NIHMS821065-supplement-Supplement.pdf]

ONLINE ONLY

## Supplemental material

### Comparison of clipping and coiling in elderly patients with unruptured cerebral aneurysms

K. Bekelis et al.

<http://thejns.org/doi/abs/10.3171/2016.1.JNS152028>

**DISCLAIMER** The *Journal of Neurosurgery* acknowledges that the following section is published verbatim as submitted by the authors and did not go through either the *Journal's* peer-review or editing process.

| <b>Supplemental Table 1. Diagnostic codes used to define comorbidities</b> |                                                                                                              |
|----------------------------------------------------------------------------|--------------------------------------------------------------------------------------------------------------|
| <b>Comorbidities</b>                                                       | <b>ICD-9 Diagnostic Codes</b>                                                                                |
| Hypertension                                                               | 401.x, 402.x, 403.x, 404.x                                                                                   |
| Hyperlipidemia                                                             | 272.1, 272.2, 272.3, 272.4                                                                                   |
| Chronic obstructive pulmonary disease (COPD)                               | 415.0, 416.8, 416.9, 491.0, 492.0, 494.0, 496.0<br>305.1, V15.82, 989.84                                     |
| Myocardial Infarction                                                      | 410.0-6, 410.8x, 410.71, 410.70, 410.90, 410.91                                                              |
| Cardiac Arrhythmia                                                         | 426.10, 426.11, 426.13, 426.2-426.53, 426.6-426.89, 427.0, 427.2, 427.31, 427.60, 427.9, 785.0, V45.0, V53.3 |
| Coagulopathy                                                               | 286.x, 287.1, 287.3, 287.4, 287.5                                                                            |
| Renal Insufficiency                                                        | 585-586, V420, V451, V56.x                                                                                   |
| Congestive Heart Failure                                                   | 402.01, 402.11, 402.91, 425.0-9, 428.0-428.9, 429.3, 404.01, 404.03, 404.11, 404.13, 404.91, 404.93          |
| Pulmonary Disease (non-COPD)                                               | 493.xx                                                                                                       |
| Obesity                                                                    | 278.00, 278.01                                                                                               |
| Alcohol abuse                                                              | 291.xx, 303.9x, 305.0x, V113                                                                                 |
| Dementia                                                                   | 290.xx, 331.0-331.2                                                                                          |
| Ischemic Stroke                                                            | 433.xx, 434.xx, 435.xx                                                                                       |
| Diabetes                                                                   | 250.x                                                                                                        |
| Peripheral Vascular Disease                                                | 440.x, 441.x, 442.x, 443.x, 447.1, 785.4                                                                     |
| Malignancy                                                                 | 140.x-1719.x<br>174.x-1959.x<br>200.x-2089.x<br>2730.x, 2733.x, V1046<br>196.x-1999.x                        |

## Supplementary Methods

### Primer on Using Instrumental Variables

The methodology of instrumental variables has become increasingly popular over the past decade. This method provides a way to estimate a treatment effect without bias despite the presence of confounding (i.e. unknown baseline functional clinical status of patients, or aneurysm location and size).

A variable is defined as an instrument if it satisfies the following three assumptions; 1, the instrument has an effect on treatment choice; 2, the instrument has no effect on the outcome except through its effect on the treatment choice; 3, there are no variables that affect both the instrument and the outcome. The last assumption is the same as saying that there are no confounders of the instrument and the outcome. The properties of an instrument are exhibited in the figure below. This graphic, which is an example of a directed acyclic graph (DAG), shows the instrumental variable (IV) effects the outcome, Y, which is only through its effect on the treatment, X. The directed lines in red indicate paths that if true would disqualify the variable IV from being called an instrumental variable.

Instrumental variables do indeed exist. We make them all the time when we run a randomized trial. Randomization is an example of an instrumental variable, because the flip of a coin, or a computer generated random number determine the treatment a subject is assigned and therefore the treatment a subject receives. However, when health services or clinical researchers think of instrumental variables they are usually conceiving of some natural experiment. For instance, the Vietnam draft lottery could be used as an instrument of the effect of military service on outcomes.

Favored choices for instrumental variables in the medical literature so far have been geographic distances, or geographic rates. The thinking with distances is that the differential distance a patient has to travel to get treatment A, versus treatment B, will affect their choice of treatment but is not expected to otherwise have an effect on the outcome. Geographic rates may be regarded as a natural experiment. For instance, living in an area that has a high rate of treatment A compared to treatment B affects the treatment a subject receives but should have no direct effect on the outcomes. Likewise a provider propensity to prescribe one treatment over another may be employed as an instrument.
